# Supplementary material
Source: publisher figshare collection journal article supplement (https://acs.figshare.com/ndownloader/files/3799267)
Supplement: Supplementary file 1 [file 3799267]

 
data_g39jas 
 
_audit_creation_method            SHELXL-97 
_audit_update_record 
; 
2006-05-04   text and data added, srw 
; 
 
_chemical_name_systematic 
; 
? 
; 
 
_chemical_name_common            ? 
_chemical_melting_point          ? 
_chemical_formula_moiety         'C43 H46 O2 P2 Pd Si, C6 H6, 0.5(C6 H6)' 
_chemical_formula_sum 
 'C52 H55 O2 P2 Pd Si' 
_chemical_formula_structural     ? 
_chemical_formula_weight          908.39 
 
_chemical_absolute_configuration . 
_chemical_formula_analytical     ? 
_chemical_compound_source        ? 
 
loop_ 
 _atom_type_symbol 
 _atom_type_description 
 _atom_type_scat_dispersion_real 
 _atom_type_scat_dispersion_imag 
 _atom_type_scat_source 
 'C'  'C'   0.0033   0.0016 
 'International Tables Vol C Tables 4.2.6.8 and 6.1.1.4' 
 'H'  'H'   0.0000   0.0000 
 'International Tables Vol C Tables 4.2.6.8 and 6.1.1.4' 
 'O'  'O'   0.0106   0.0060 
 'International Tables Vol C Tables 4.2.6.8 and 6.1.1.4' 
 'Si'  'Si'   0.0817   0.0704 
 'International Tables Vol C Tables 4.2.6.8 and 6.1.1.4' 
 'P'  'P'   0.1023   0.0942 
 'International Tables Vol C Tables 4.2.6.8 and 6.1.1.4' 
 'Pd'  'Pd'  -0.9988   1.0072 
 'International Tables Vol C Tables 4.2.6.8 and 6.1.1.4' 
 
_symmetry_cell_setting           'Triclinic' 
_symmetry_space_group_name_H-M   'P -1  ' 
_symmetry_space_group_name_Hall  '-P 1 ' 
 
loop_ 
 _symmetry_equiv_pos_as_xyz 
 'x, y, z' 
 '-x, -y, -z' 
 
_cell_length_a                    10.3193(6) 
_cell_length_b                    10.8718(6) 
_cell_length_c                    20.9256(11) 
_cell_angle_alpha                 93.3770(10) 
_cell_angle_beta                  96.2100(10) 
_cell_angle_gamma                 95.5570(10) 
_cell_volume                      2317.2(2) 
_cell_formula_units_Z             2 
_cell_measurement_temperature     193(2) 
_cell_measurement_reflns_used    9347 
_cell_measurement_theta_min        2.19 
_cell_measurement_theta_max       26.85 
_exptl_crystal_description       'tabular' 
_exptl_crystal_colour            'colourless' 
_exptl_crystal_size_max          0.36 
_exptl_crystal_size_mid          0.26 
_exptl_crystal_size_min          0.08 
_exptl_crystal_density_meas      ? 
_exptl_crystal_density_diffrn     1.302 
_exptl_crystal_density_method    'not measured' 
_exptl_crystal_F_000              946 
_exptl_crystal_id                g39jas 
 
_exptl_crystal_preparation 
; 
The data crystal was mounted using oil (Parantone-N, Exxon) to a 
0.3 mm cryo-loop (Hampton Research) with the (0 1 0) scattering planes 
roughly normal to the spindle axis. 
; 
_exptl_absorpt_coefficient_mu     0.534 
_exptl_absorpt_correction_type   'integration' 
_exptl_absorpt_correction_T_min  0.8415 
_exptl_absorpt_correction_T_max  0.9565 
_exptl_absorpt_process_details   'SHELXTL/XPREP (Bruker, 2001)' 
 
_exptl_special_details 
; 
One distinct cell was identified using SMART (Bruker, 2001).  Five 
frame series were integrated and filtered for statistical outliers 
using SAINT (Bruker, 2001) then corrected for absorption by 
integration using SHELXTL/XPREP (Bruker, 2001) before using 
SAINT/SADABS (Bruker, 2001) to sort, merge, and scale the combined 
data.  A series of identical frames was collected twice during the 
experiment to monitor decay.  No decay correction was applied. 
; 
 
_diffrn_ambient_temperature       193(2) 
_diffrn_radiation_wavelength      0.71073 
_diffrn_radiation_wavelength_id  g39jas 
_diffrn_radiation_type           'MoK\a' 
_diffrn_radiation_source         'normal-focus sealed tube' 
_diffrn_radiation_monochromator  'graphite' 
_diffrn_measurement_device_type   ? 
_diffrn_measurement_device       'Siemens Platform/CCD' 
_diffrn_measurement_method       'profile data from \w scans' 
 
_diffrn_detector_area_resol_mean  ? 
_diffrn_standards_number         98 
_diffrn_standards_interval_count  ? 
_diffrn_standards_interval_time  365 
 
_diffrn_standards_decay_%        2.6 
_diffrn_reflns_number            24188 
 
_diffrn_reflns_av_R_equivalents   0.0368 
_diffrn_reflns_av_sigmaI/netI     0.0443 
_diffrn_reflns_limit_h_min        -12 
_diffrn_reflns_limit_h_max        12 
_diffrn_reflns_limit_k_min        -13 
_diffrn_reflns_limit_k_max        13 
_diffrn_reflns_limit_l_min        -25 
_diffrn_reflns_limit_l_max        25 
_diffrn_reflns_theta_min          2.00 
_diffrn_reflns_theta_max          25.39 
_reflns_number_total              8499 
_reflns_number_gt                 6872 
_reflns_threshold_expression      >2sigma(I) 
 
_computing_data_collection       'SMART V5.625 (Bruker, 2001)' 
_computing_cell_refinement       'SAINT V6.22 (Bruker, 2001)' 
_computing_data_reduction        'SAINT V6.22 (Bruker, 2001)' 
_computing_structure_solution    'SHELXTL V6.12 (Bruker, 2001)' 
_computing_structure_refinement  'SHELXTL V6.12 (Bruker, 2001)' 
_computing_molecular_graphics    'SHELXTL V6.12 (Bruker, 2001)' 
_computing_publication_material  'XCIF (Bruker, 2001)' 
 
_refine_special_details 
; 
Structure was phased by direct methods.  Systematic conditions 
suggested the ambiguous space group.  The space group choice was 
confirmed by successful convergence of the full-matrix least-squares 
refinement on F^2^.  The highest peaks in the final difference Fourier 
map were in the vicinity of atoms P1 and Pd1; the final map had no 
other significant features.  A final analysis of variance between 
observed and calculated structure factors showed no dependence on 
amplitude or resolution. 
; 
 
_refine_ls_structure_factor_coef  Fsqd 
_refine_ls_matrix_type            full 
_refine_ls_weighting_scheme       calc 
_refine_ls_weighting_details 
 'calc w=1/[\s^2^(Fo^2^)+(0.0333P)^2^+0.6169P] where P=(Fo^2^+2Fc^2^)/3' 
_atom_sites_solution_primary      direct 
_atom_sites_solution_secondary    difmap 
_atom_sites_solution_hydrogens    geom 
_refine_ls_hydrogen_treatment    noref 
_refine_ls_extinction_method      none 
_refine_ls_extinction_coef        ? 
_refine_ls_number_reflns          8499 
_refine_ls_number_parameters      573 
_refine_ls_number_restraints      228 
_refine_ls_R_factor_all           0.0479 
_refine_ls_R_factor_gt            0.0330 
_refine_ls_wR_factor_ref          0.0777 
_refine_ls_wR_factor_gt           0.0731 
_refine_ls_goodness_of_fit_ref    1.048 
_refine_ls_restrained_S_all       1.042 
_refine_ls_shift/su_max           0.013 
_refine_ls_shift/su_mean          0.000 
 
loop_ 
 _atom_site_label 
 _atom_site_type_symbol 
 _atom_site_fract_x 
 _atom_site_fract_y 
 _atom_site_fract_z 
 _atom_site_U_iso_or_equiv 
 _atom_site_adp_type 
 _atom_site_occupancy 
 _atom_site_symmetry_multiplicity 
 _atom_site_calc_flag 
 _atom_site_refinement_flags 
 _atom_site_disorder_assembly 
 _atom_site_disorder_group 
C1 C 0.5213(2) 0.3067(2) 0.20764(13) 0.0345(6) Uani 1 1 d . . . 
H1A H 0.5484 0.2225 0.2120 0.041 Uiso 1 1 calc R . . 
H1B H 0.5516 0.3369 0.1675 0.041 Uiso 1 1 calc R . . 
C2 C 0.5897(2) 0.3916(2) 0.26470(13) 0.0373(6) Uani 1 1 d . . . 
H2A H 0.5416 0.3788 0.3026 0.045 Uiso 1 1 calc R . . 
H2B H 0.6795 0.3683 0.2755 0.045 Uiso 1 1 calc R . . 
C3 C 0.5977(2) 0.5283(2) 0.25130(13) 0.0347(6) Uani 1 1 d . . . 
H3A H 0.6292 0.5378 0.2087 0.042 Uiso 1 1 calc R . . 
H3B H 0.6635 0.5751 0.2840 0.042 Uiso 1 1 calc R . . 
C4 C 0.3089(2) 0.2018(2) 0.26635(12) 0.0323(6) Uani 1 1 d . . . 
C5 C 0.2694(3) 0.2558(3) 0.32184(13) 0.0418(7) Uani 1 1 d . . . 
H5 H 0.2542 0.3406 0.3239 0.050 Uiso 1 1 calc R . . 
C6 C 0.2522(3) 0.1860(3) 0.37434(15) 0.0597(9) Uani 1 1 d . . . 
H6 H 0.2264 0.2233 0.4125 0.072 Uiso 1 1 calc R . . 
C7 C 0.2728(3) 0.0631(3) 0.37091(16) 0.0629(9) Uani 1 1 d . . . 
H7 H 0.2598 0.0151 0.4066 0.075 Uiso 1 1 calc R . . 
C8 C 0.3118(3) 0.0089(3) 0.31627(15) 0.0531(8) Uani 1 1 d . . . 
H8 H 0.3259 -0.0763 0.3143 0.064 Uiso 1 1 calc R . . 
C9 C 0.3306(3) 0.0776(2) 0.26455(13) 0.0399(7) Uani 1 1 d . . . 
H9 H 0.3588 0.0399 0.2271 0.048 Uiso 1 1 calc R . . 
C10 C 0.2959(2) 0.1961(2) 0.12587(12) 0.0317(6) Uani 1 1 d . . . 
C11 C 0.1864(3) 0.1093(2) 0.11951(13) 0.0354(6) Uani 1 1 d . . . 
H11 H 0.1372 0.0970 0.1549 0.042 Uiso 1 1 calc R . . 
C12 C 0.1491(3) 0.0406(3) 0.06108(14) 0.0447(7) Uani 1 1 d . . . 
H12 H 0.0748 -0.0195 0.0569 0.054 Uiso 1 1 calc R . . 
C13 C 0.2180(3) 0.0585(3) 0.00963(14) 0.0544(8) Uani 1 1 d . . . 
H13 H 0.1913 0.0114 -0.0301 0.065 Uiso 1 1 calc R . . 
C14 C 0.3258(3) 0.1443(3) 0.01529(15) 0.0596(9) Uani 1 1 d . . . 
H14 H 0.3739 0.1563 -0.0205 0.072 Uiso 1 1 calc R . . 
C15 C 0.3647(3) 0.2134(3) 0.07295(13) 0.0463(7) Uani 1 1 d . . . 
H15 H 0.4390 0.2732 0.0765 0.056 Uiso 1 1 calc R . . 
C16 C 0.4336(2) 0.6461(2) 0.33663(12) 0.0328(6) Uani 1 1 d . . . 
C17 C 0.3139(3) 0.6755(3) 0.35316(13) 0.0408(7) Uani 1 1 d . . . 
H17 H 0.2397 0.6660 0.3215 0.049 Uiso 1 1 calc R . . 
C18 C 0.3008(3) 0.7185(3) 0.41532(14) 0.0512(8) Uani 1 1 d . . . 
H18 H 0.2182 0.7400 0.4258 0.061 Uiso 1 1 calc R . . 
C19 C 0.4056(3) 0.7304(3) 0.46203(15) 0.0556(8) Uani 1 1 d . . . 
H19 H 0.3964 0.7606 0.5047 0.067 Uiso 1 1 calc R . . 
C20 C 0.5244(3) 0.6980(4) 0.44645(16) 0.0707(11) Uani 1 1 d . . . 
H20 H 0.5974 0.7044 0.4787 0.085 Uiso 1 1 calc R . . 
C21 C 0.5382(3) 0.6564(3) 0.38415(15) 0.0619(9) Uani 1 1 d . . . 
H21 H 0.6209 0.6346 0.3739 0.074 Uiso 1 1 calc R . . 
C22 C 0.4831(2) 0.7421(2) 0.21454(12) 0.0318(6) Uani 1 1 d . . . 
C23 C 0.3983(3) 0.7783(2) 0.16459(12) 0.0359(6) Uani 1 1 d . . . 
H23 H 0.3149 0.7328 0.1531 0.043 Uiso 1 1 calc R . . 
C24 C 0.4346(3) 0.8805(2) 0.13128(14) 0.0442(7) Uani 1 1 d . . . 
H24 H 0.3759 0.9048 0.0973 0.053 Uiso 1 1 calc R . . 
C25 C 0.5551(3) 0.9465(3) 0.14736(16) 0.0520(8) Uani 1 1 d . . . 
H25 H 0.5805 1.0150 0.1237 0.062 Uiso 1 1 calc R . . 
C26 C 0.6391(3) 0.9140(3) 0.19746(18) 0.0589(9) Uani 1 1 d . . . 
H26 H 0.7216 0.9612 0.2091 0.071 Uiso 1 1 calc R . . 
C27 C 0.6036(3) 0.8121(3) 0.23118(16) 0.0490(8) Uani 1 1 d . . . 
H27 H 0.6620 0.7900 0.2659 0.059 Uiso 1 1 calc R . . 
C28 C -0.0342(2) 0.6713(2) 0.29750(13) 0.0343(6) Uani 1 1 d . . . 
C29 C -0.0534(3) 0.7724(3) 0.33882(14) 0.0451(7) Uani 1 1 d . . . 
H29 H -0.0394 0.8536 0.3247 0.054 Uiso 1 1 calc R . . 
C30 C -0.0920(3) 0.7583(3) 0.39936(14) 0.0480(7) Uani 1 1 d . . . 
H30 H -0.1041 0.8293 0.4259 0.058 Uiso 1 1 calc R . . 
C31 C -0.1130(3) 0.6424(3) 0.42149(14) 0.0432(7) Uani 1 1 d . . . 
C32 C -0.0952(3) 0.5401(3) 0.38296(14) 0.0463(7) Uani 1 1 d . . . 
H32 H -0.1090 0.4594 0.3977 0.056 Uiso 1 1 calc R . . 
C33 C -0.0569(3) 0.5563(3) 0.32253(14) 0.0424(7) Uani 1 1 d . . . 
H33 H -0.0453 0.4846 0.2964 0.051 Uiso 1 1 calc R . . 
C34 C -0.1957(4) 0.5208(3) 0.50284(17) 0.0719(10) Uani 1 1 d . . . 
H34A H -0.2674 0.4813 0.4716 0.108 Uiso 1 1 calc R . . 
H34B H -0.2270 0.5312 0.5452 0.108 Uiso 1 1 calc R . . 
H34C H -0.1233 0.4686 0.5056 0.108 Uiso 1 1 calc R . . 
C35 C -0.1209(2) 0.6085(3) 0.15603(13) 0.0406(7) Uani 1 1 d . . . 
H35A H -0.0963 0.6096 0.1121 0.061 Uiso 1 1 calc R . . 
H35B H -0.1979 0.6537 0.1591 0.061 Uiso 1 1 calc R . . 
H35C H -0.1415 0.5226 0.1664 0.061 Uiso 1 1 calc R . . 
C36 C 0.0338(3) 0.8514(3) 0.19731(16) 0.0518(8) Uani 1 1 d . . . 
H36A H 0.0958 0.8980 0.2310 0.078 Uiso 1 1 calc R . . 
H36B H -0.0520 0.8831 0.1969 0.078 Uiso 1 1 calc R . . 
H36C H 0.0660 0.8608 0.1553 0.078 Uiso 1 1 calc R . . 
C37 C 0.0813(2) 0.3665(2) 0.16768(12) 0.0294(6) Uani 1 1 d . . . 
C38 C 0.0009(2) 0.2999(2) 0.20602(14) 0.0379(6) Uani 1 1 d . . . 
H38 H 0.0280 0.2975 0.2508 0.045 Uiso 1 1 calc R . . 
C39 C -0.1185(3) 0.2369(2) 0.17933(16) 0.0476(8) Uani 1 1 d . . . 
H39 H -0.1730 0.1926 0.2058 0.057 Uiso 1 1 calc R . . 
C40 C -0.1570(3) 0.2391(3) 0.11461(17) 0.0526(8) Uani 1 1 d . . . 
H40 H -0.2385 0.1964 0.0964 0.063 Uiso 1 1 calc R . . 
C41 C -0.0788(3) 0.3023(3) 0.07598(15) 0.0465(7) Uani 1 1 d . . . 
H41 H -0.1062 0.3020 0.0311 0.056 Uiso 1 1 calc R . . 
C42 C 0.0415(2) 0.3676(2) 0.10188(13) 0.0369(6) Uani 1 1 d . . . 
C43 C 0.1241(3) 0.4381(3) 0.05896(14) 0.0490(8) Uani 1 1 d . . . 
H43A H 0.1242 0.5272 0.0694 0.073 Uiso 1 1 calc R . . 
H43B H 0.0882 0.4178 0.0139 0.073 Uiso 1 1 calc R . . 
H43C H 0.2140 0.4156 0.0655 0.073 Uiso 1 1 calc R . . 
O1 O 0.15433(15) 0.62912(15) 0.20883(8) 0.0342(4) Uani 1 1 d . . . 
O2 O -0.1514(2) 0.6388(2) 0.48266(10) 0.0614(6) Uani 1 1 d . . . 
P1 P 0.34172(6) 0.29678(6) 0.19982(3) 0.02819(15) Uani 1 1 d . . . 
P2 P 0.44280(6) 0.59734(6) 0.25199(3) 0.02956(15) Uani 1 1 d . . . 
Pd1 Pd 0.250844(17) 0.472837(17) 0.205776(9) 0.02739(7) Uani 1 1 d . . . 
Si1 Si 0.01784(6) 0.68370(6) 0.21388(4) 0.03202(17) Uani 1 1 d . . . 
C44 C 0.0878(8) 0.8594(11) 0.5654(5) 0.067(2) Uani 0.384(11) 1 d PGU A 1 
H44 H 0.0032 0.8266 0.5458 0.080 Uiso 0.384(11) 1 calc PR A 1 
C45 C 0.1728(10) 0.9264(11) 0.5299(4) 0.060(2) Uani 0.384(11) 1 d PGU A 1 
H45 H 0.1464 0.9393 0.4861 0.073 Uiso 0.384(11) 1 calc PR A 1 
C46 C 0.2966(9) 0.9745(11) 0.5585(5) 0.062(2) Uani 0.384(11) 1 d PGU A 1 
H46 H 0.3547 1.0203 0.5343 0.075 Uiso 0.384(11) 1 calc PR A 1 
C47 C 0.3353(7) 0.9557(12) 0.6226(5) 0.070(2) Uani 0.384(11) 1 d PGU A 1 
H47 H 0.4199 0.9886 0.6422 0.084 Uiso 0.384(11) 1 calc PR A 1 
C48 C 0.2503(12) 0.8887(10) 0.6581(4) 0.081(3) Uani 0.384(11) 1 d PGU A 1 
H48 H 0.2767 0.8758 0.7019 0.097 Uiso 0.384(11) 1 calc PR A 1 
C49 C 0.1265(12) 0.8406(9) 0.6294(4) 0.078(2) Uani 0.384(11) 1 d PGU A 1 
H49 H 0.0684 0.7948 0.6537 0.093 Uiso 0.384(11) 1 calc PR A 1 
C50 C 0.5491(15) 0.5617(12) 0.0572(8) 0.027(2) Uani 0.50 1 d PGU . . 
H50 H 0.5764 0.6135 0.0954 0.032 Uiso 0.50 1 calc PR . . 
C51 C 0.6244(15) 0.4691(13) 0.0391(9) 0.033(2) Uani 0.50 1 d PGU . . 
H51 H 0.7033 0.4576 0.0650 0.039 Uiso 0.50 1 calc PR . . 
C52 C 0.5844(16) 0.3932(13) -0.0167(9) 0.035(2) Uani 0.50 1 d PGU . . 
H52 H 0.6359 0.3299 -0.0291 0.042 Uiso 0.50 1 calc PR . . 
C53 C 0.4689(16) 0.4100(12) -0.0545(8) 0.034(2) Uani 0.50 1 d PGU . . 
H53 H 0.4416 0.3582 -0.0926 0.040 Uiso 0.50 1 calc PR . . 
C54 C 0.3936(16) 0.5026(12) -0.0364(8) 0.031(2) Uani 0.50 1 d PGU . . 
H54 H 0.3147 0.5141 -0.0622 0.037 Uiso 0.50 1 calc PR . . 
C55 C 0.4336(15) 0.5785(12) 0.0194(8) 0.031(2) Uani 0.50 1 d PGU . . 
H55 H 0.3821 0.6418 0.0318 0.038 Uiso 0.50 1 calc PR . . 
C56 C 0.1175(5) 0.8312(6) 0.5738(3) 0.0676(17) Uani 0.616(11) 1 d PGU A 2 
H56 H 0.0374 0.7795 0.5638 0.081 Uiso 0.616(11) 1 calc PR A 2 
C57 C 0.1540(6) 0.9203(7) 0.5324(3) 0.0621(16) Uani 0.616(11) 1 d PGU A 2 
H57 H 0.0988 0.9294 0.4939 0.074 Uiso 0.616(11) 1 calc PR A 2 
C58 C 0.2713(6) 0.9959(6) 0.5471(3) 0.0624(17) Uani 0.616(11) 1 d PGU A 2 
H58 H 0.2962 1.0568 0.5187 0.075 Uiso 0.616(11) 1 calc PR A 2 
C59 C 0.3520(4) 0.9825(5) 0.6033(3) 0.0656(17) Uani 0.616(11) 1 d PGU A 2 
H59 H 0.4321 1.0342 0.6134 0.079 Uiso 0.616(11) 1 calc PR A 2 
C60 C 0.3155(8) 0.8935(5) 0.6448(3) 0.076(2) Uani 0.616(11) 1 d PGU A 2 
H60 H 0.3707 0.8843 0.6833 0.091 Uiso 0.616(11) 1 calc PR A 2 
C61 C 0.1983(9) 0.8178(5) 0.6301(3) 0.082(2) Uani 0.616(11) 1 d PGU A 2 
H61 H 0.1733 0.7570 0.6585 0.098 Uiso 0.616(11) 1 calc PR A 2 
 
loop_ 
 _atom_site_aniso_label 
 _atom_site_aniso_U_11 
 _atom_site_aniso_U_22 
 _atom_site_aniso_U_33 
 _atom_site_aniso_U_23 
 _atom_site_aniso_U_13 
 _atom_site_aniso_U_12 
C1 0.0316(14) 0.0309(14) 0.0420(16) 0.0016(12) 0.0061(12) 0.0059(11) 
C2 0.0251(13) 0.0379(15) 0.0483(17) 0.0017(13) 0.0009(12) 0.0039(11) 
C3 0.0216(13) 0.0334(14) 0.0479(17) -0.0001(12) 0.0022(11) 0.0008(11) 
C4 0.0290(13) 0.0350(15) 0.0310(14) 0.0021(11) 0.0016(11) -0.0031(11) 
C5 0.0449(17) 0.0456(17) 0.0345(16) 0.0005(13) 0.0030(13) 0.0055(13) 
C6 0.067(2) 0.079(3) 0.0333(18) 0.0047(17) 0.0121(16) 0.0050(19) 
C7 0.077(2) 0.068(2) 0.044(2) 0.0267(18) 0.0083(17) -0.0052(19) 
C8 0.065(2) 0.0440(18) 0.050(2) 0.0158(15) 0.0010(16) 0.0012(15) 
C9 0.0453(16) 0.0348(15) 0.0390(16) 0.0057(13) 0.0034(13) 0.0009(12) 
C10 0.0362(14) 0.0266(13) 0.0313(14) 0.0002(11) 0.0004(11) 0.0041(11) 
C11 0.0380(15) 0.0318(14) 0.0351(15) 0.0023(12) 0.0002(12) 0.0025(12) 
C12 0.0471(17) 0.0372(16) 0.0443(18) -0.0043(13) -0.0117(14) -0.0006(13) 
C13 0.079(2) 0.0473(19) 0.0337(17) -0.0109(14) -0.0013(16) 0.0075(17) 
C14 0.082(2) 0.060(2) 0.0364(18) -0.0068(16) 0.0192(17) -0.0019(19) 
C15 0.0555(19) 0.0428(17) 0.0389(17) 0.0015(13) 0.0092(14) -0.0077(14) 
C16 0.0312(14) 0.0278(14) 0.0365(15) 0.0006(11) -0.0015(11) -0.0037(11) 
C17 0.0344(15) 0.0491(17) 0.0388(16) 0.0043(13) 0.0019(12) 0.0064(13) 
C18 0.0520(19) 0.060(2) 0.0438(19) 0.0023(15) 0.0117(15) 0.0118(16) 
C19 0.070(2) 0.057(2) 0.0368(18) -0.0060(15) 0.0046(16) 0.0005(17) 
C20 0.056(2) 0.100(3) 0.048(2) -0.018(2) -0.0163(17) 0.005(2) 
C21 0.0368(17) 0.091(3) 0.052(2) -0.0162(19) -0.0058(15) 0.0068(17) 
C22 0.0291(13) 0.0264(13) 0.0401(15) -0.0033(11) 0.0094(12) 0.0015(11) 
C23 0.0340(14) 0.0328(15) 0.0416(16) -0.0011(12) 0.0100(12) 0.0027(12) 
C24 0.0511(18) 0.0354(16) 0.0497(18) 0.0057(14) 0.0141(14) 0.0118(14) 
C25 0.059(2) 0.0286(16) 0.075(2) 0.0060(15) 0.0324(18) 0.0052(14) 
C26 0.0408(18) 0.0344(17) 0.100(3) 0.0054(17) 0.0138(18) -0.0097(14) 
C27 0.0369(16) 0.0358(16) 0.070(2) 0.0022(15) -0.0034(15) -0.0043(13) 
C28 0.0216(13) 0.0356(15) 0.0434(16) -0.0018(12) -0.0035(11) 0.0025(11) 
C29 0.0433(17) 0.0323(15) 0.058(2) -0.0025(14) 0.0060(14) 0.0011(13) 
C30 0.0488(18) 0.0465(18) 0.0475(19) -0.0113(14) 0.0109(15) 0.0015(14) 
C31 0.0323(15) 0.0544(19) 0.0405(17) -0.0007(14) -0.0012(13) 0.0002(13) 
C32 0.0485(18) 0.0398(17) 0.0501(19) 0.0052(14) 0.0029(14) 0.0036(14) 
C33 0.0481(17) 0.0356(16) 0.0422(17) -0.0008(13) 0.0007(14) 0.0048(13) 
C34 0.080(3) 0.084(3) 0.056(2) 0.022(2) 0.0225(19) 0.004(2) 
C35 0.0295(14) 0.0506(17) 0.0405(16) -0.0008(13) 0.0022(12) 0.0025(13) 
C36 0.0424(17) 0.0414(17) 0.073(2) 0.0136(16) 0.0058(16) 0.0050(14) 
C37 0.0237(13) 0.0228(13) 0.0407(16) -0.0026(11) 0.0013(11) 0.0025(10) 
C38 0.0330(15) 0.0316(15) 0.0489(17) -0.0012(13) 0.0075(13) 0.0013(12) 
C39 0.0362(16) 0.0332(16) 0.073(2) -0.0001(15) 0.0164(15) -0.0077(12) 
C40 0.0331(16) 0.0410(17) 0.077(2) -0.0150(16) -0.0023(16) -0.0082(13) 
C41 0.0356(16) 0.0489(18) 0.0506(19) -0.0100(15) -0.0098(14) 0.0068(14) 
C42 0.0281(14) 0.0371(15) 0.0441(17) -0.0028(13) 0.0002(12) 0.0040(11) 
C43 0.0454(17) 0.062(2) 0.0393(17) 0.0096(15) -0.0015(14) 0.0080(15) 
O1 0.0223(9) 0.0310(9) 0.0485(11) 0.0006(8) 0.0016(8) 0.0021(7) 
O2 0.0661(15) 0.0719(15) 0.0452(13) -0.0023(11) 0.0145(11) -0.0039(12) 
P1 0.0276(3) 0.0257(3) 0.0304(4) 0.0000(3) 0.0030(3) -0.0003(3) 
P2 0.0218(3) 0.0268(3) 0.0386(4) -0.0008(3) 0.0011(3) -0.0006(3) 
Pd1 0.02115(10) 0.02554(11) 0.03419(12) -0.00025(8) 0.00172(8) -0.00108(7) 
Si1 0.0231(4) 0.0297(4) 0.0423(4) 0.0018(3) 0.0008(3) 0.0012(3) 
C44 0.073(4) 0.066(5) 0.059(4) 0.009(4) -0.004(4) -0.002(4) 
C45 0.057(4) 0.071(4) 0.053(4) 0.001(4) 0.000(3) 0.011(4) 
C46 0.058(4) 0.071(4) 0.058(4) 0.011(4) -0.004(4) 0.012(4) 
C47 0.072(4) 0.074(5) 0.058(5) 0.011(4) -0.012(4) -0.006(4) 
C48 0.089(5) 0.079(5) 0.067(4) 0.018(4) -0.015(4) -0.012(5) 
C49 0.084(5) 0.074(4) 0.070(4) 0.018(4) -0.008(5) -0.008(4) 
C50 0.026(4) 0.019(5) 0.035(4) -0.002(4) -0.006(3) 0.011(4) 
C51 0.029(5) 0.026(6) 0.046(4) 0.010(4) 0.001(3) 0.016(3) 
C52 0.032(5) 0.030(6) 0.045(4) -0.003(4) 0.001(3) 0.019(4) 
C53 0.040(5) 0.028(6) 0.033(4) 0.002(4) 0.001(4) 0.014(4) 
C54 0.023(4) 0.029(6) 0.039(3) 0.009(4) -0.012(3) 0.013(4) 
C55 0.030(5) 0.021(5) 0.046(4) 0.001(4) 0.003(3) 0.020(4) 
C56 0.070(3) 0.063(3) 0.065(3) -0.002(3) -0.010(3) 0.006(3) 
C57 0.059(3) 0.074(3) 0.053(3) -0.003(3) 0.001(3) 0.013(3) 
C58 0.059(3) 0.073(4) 0.054(3) 0.007(3) -0.013(3) 0.021(3) 
C59 0.079(3) 0.063(3) 0.051(4) 0.007(3) -0.015(3) 0.010(3) 
C60 0.085(4) 0.070(3) 0.064(4) 0.016(3) -0.021(3) -0.010(4) 
C61 0.095(5) 0.068(4) 0.075(3) 0.015(3) -0.021(4) -0.007(4) 
 
_geom_special_details 
; 
 All esds (except the esd in the dihedral angle between two l.s. planes) 
 are estimated using the full covariance matrix.  The cell esds are taken 
 into account individually in the estimation of esds in distances, angles 
 and torsion angles; correlations between esds in cell parameters are only 
 used when they are defined by crystal symmetry.  An approximate (isotropic) 
 treatment of cell esds is used for estimating esds involving l.s. planes. 
; 
 
loop_ 
 _geom_bond_atom_site_label_1 
 _geom_bond_atom_site_label_2 
 _geom_bond_distance 
 _geom_bond_site_symmetry_2 
 _geom_bond_publ_flag 
C1 C2 1.529(3) . ? 
C1 P1 1.835(2) . ? 
C1 H1A 0.9900 . ? 
C1 H1B 0.9900 . ? 
C2 C3 1.524(3) . ? 
C2 H2A 0.9900 . ? 
C2 H2B 0.9900 . ? 
C3 P2 1.832(2) . ? 
C3 H3A 0.9900 . ? 
C3 H3B 0.9900 . ? 
C4 C5 1.388(4) . ? 
C4 C9 1.389(4) . ? 
C4 P1 1.823(3) . ? 
C5 C6 1.388(4) . ? 
C5 H5 0.9500 . ? 
C6 C7 1.373(5) . ? 
C6 H6 0.9500 . ? 
C7 C8 1.372(4) . ? 
C7 H7 0.9500 . ? 
C8 C9 1.371(4) . ? 
C8 H8 0.9500 . ? 
C9 H9 0.9500 . ? 
C10 C11 1.389(3) . ? 
C10 C15 1.391(4) . ? 
C10 P1 1.833(2) . ? 
C11 C12 1.392(4) . ? 
C11 H11 0.9500 . ? 
C12 C13 1.366(4) . ? 
C12 H12 0.9500 . ? 
C13 C14 1.371(4) . ? 
C13 H13 0.9500 . ? 
C14 C15 1.382(4) . ? 
C14 H14 0.9500 . ? 
C15 H15 0.9500 . ? 
C16 C21 1.378(4) . ? 
C16 C17 1.380(4) . ? 
C16 P2 1.834(3) . ? 
C17 C18 1.381(4) . ? 
C17 H17 0.9500 . ? 
C18 C19 1.368(4) . ? 
C18 H18 0.9500 . ? 
C19 C20 1.374(5) . ? 
C19 H19 0.9500 . ? 
C20 C21 1.381(4) . ? 
C20 H20 0.9500 . ? 
C21 H21 0.9500 . ? 
C22 C23 1.389(4) . ? 
C22 C27 1.392(3) . ? 
C22 P2 1.831(3) . ? 
C23 C24 1.389(4) . ? 
C23 H23 0.9500 . ? 
C24 C25 1.372(4) . ? 
C24 H24 0.9500 . ? 
C25 C26 1.372(4) . ? 
C25 H25 0.9500 . ? 
C26 C27 1.389(4) . ? 
C26 H26 0.9500 . ? 
C27 H27 0.9500 . ? 
C28 C33 1.393(4) . ? 
C28 C29 1.401(4) . ? 
C28 Si1 1.893(3) . ? 
C29 C30 1.381(4) . ? 
C29 H29 0.9500 . ? 
C30 C31 1.374(4) . ? 
C30 H30 0.9500 . ? 
C31 C32 1.374(4) . ? 
C31 O2 1.382(3) . ? 
C32 C33 1.381(4) . ? 
C32 H32 0.9500 . ? 
C33 H33 0.9500 . ? 
C34 O2 1.423(4) . ? 
C34 H34A 0.9800 . ? 
C34 H34B 0.9800 . ? 
C34 H34C 0.9800 . ? 
C35 Si1 1.862(3) . ? 
C35 H35A 0.9800 . ? 
C35 H35B 0.9800 . ? 
C35 H35C 0.9800 . ? 
C36 Si1 1.871(3) . ? 
C36 H36A 0.9800 . ? 
C36 H36B 0.9800 . ? 
C36 H36C 0.9800 . ? 
C37 C42 1.395(4) . ? 
C37 C38 1.397(3) . ? 
C37 Pd1 2.057(2) . ? 
C38 C39 1.393(4) . ? 
C38 H38 0.9500 . ? 
C39 C40 1.372(4) . ? 
C39 H39 0.9500 . ? 
C40 C41 1.370(4) . ? 
C40 H40 0.9500 . ? 
C41 C42 1.406(4) . ? 
C41 H41 0.9500 . ? 
C42 C43 1.497(4) . ? 
C43 H43A 0.9800 . ? 
C43 H43B 0.9800 . ? 
C43 H43C 0.9800 . ? 
O1 Si1 1.5918(17) . ? 
O1 Pd1 2.0522(16) . ? 
P1 Pd1 2.2143(7) . ? 
P2 Pd1 2.3671(6) . ? 
C44 C45 1.3900 . ? 
C44 C49 1.3900 . ? 
C44 H44 0.9500 . ? 
C45 C46 1.3900 . ? 
C45 H45 0.9500 . ? 
C46 C47 1.3900 . ? 
C46 H46 0.9500 . ? 
C47 C48 1.3900 . ? 
C47 H47 0.9500 . ? 
C48 C49 1.3900 . ? 
C48 H48 0.9500 . ? 
C49 H49 0.9500 . ? 
C50 C51 1.3900 . ? 
C50 C55 1.3900 . ? 
C50 H50 0.9500 . ? 
C51 C52 1.3900 . ? 
C51 H51 0.9500 . ? 
C52 C53 1.3900 . ? 
C52 H52 0.9500 . ? 
C53 C54 1.3900 . ? 
C53 H53 0.9500 . ? 
C54 C55 1.3900 . ? 
C54 H54 0.9500 . ? 
C55 H55 0.9500 . ? 
C56 C57 1.3900 . ? 
C56 C61 1.3900 . ? 
C56 H56 0.9500 . ? 
C57 C58 1.3900 . ? 
C57 H57 0.9500 . ? 
C58 C59 1.3900 . ? 
C58 H58 0.9500 . ? 
C59 C60 1.3900 . ? 
C59 H59 0.9500 . ? 
C60 C61 1.3900 . ? 
C60 H60 0.9500 . ? 
C61 H61 0.9500 . ? 
 
loop_ 
 _geom_angle_atom_site_label_1 
 _geom_angle_atom_site_label_2 
 _geom_angle_atom_site_label_3 
 _geom_angle 
 _geom_angle_site_symmetry_1 
 _geom_angle_site_symmetry_3 
 _geom_angle_publ_flag 
C2 C1 P1 114.48(18) . . ? 
C2 C1 H1A 108.6 . . ? 
P1 C1 H1A 108.6 . . ? 
C2 C1 H1B 108.6 . . ? 
P1 C1 H1B 108.6 . . ? 
H1A C1 H1B 107.6 . . ? 
C3 C2 C1 112.9(2) . . ? 
C3 C2 H2A 109.0 . . ? 
C1 C2 H2A 109.0 . . ? 
C3 C2 H2B 109.0 . . ? 
C1 C2 H2B 109.0 . . ? 
H2A C2 H2B 107.8 . . ? 
C2 C3 P2 114.69(17) . . ? 
C2 C3 H3A 108.6 . . ? 
P2 C3 H3A 108.6 . . ? 
C2 C3 H3B 108.6 . . ? 
P2 C3 H3B 108.6 . . ? 
H3A C3 H3B 107.6 . . ? 
C5 C4 C9 118.8(2) . . ? 
C5 C4 P1 119.7(2) . . ? 
C9 C4 P1 121.3(2) . . ? 
C4 C5 C6 120.2(3) . . ? 
C4 C5 H5 119.9 . . ? 
C6 C5 H5 119.9 . . ? 
C7 C6 C5 119.8(3) . . ? 
C7 C6 H6 120.1 . . ? 
C5 C6 H6 120.1 . . ? 
C8 C7 C6 120.5(3) . . ? 
C8 C7 H7 119.8 . . ? 
C6 C7 H7 119.8 . . ? 
C9 C8 C7 120.0(3) . . ? 
C9 C8 H8 120.0 . . ? 
C7 C8 H8 120.0 . . ? 
C8 C9 C4 120.7(3) . . ? 
C8 C9 H9 119.6 . . ? 
C4 C9 H9 119.6 . . ? 
C11 C10 C15 118.8(2) . . ? 
C11 C10 P1 121.2(2) . . ? 
C15 C10 P1 119.72(19) . . ? 
C10 C11 C12 119.7(3) . . ? 
C10 C11 H11 120.2 . . ? 
C12 C11 H11 120.2 . . ? 
C13 C12 C11 120.7(3) . . ? 
C13 C12 H12 119.6 . . ? 
C11 C12 H12 119.6 . . ? 
C12 C13 C14 120.1(3) . . ? 
C12 C13 H13 120.0 . . ? 
C14 C13 H13 120.0 . . ? 
C13 C14 C15 120.1(3) . . ? 
C13 C14 H14 119.9 . . ? 
C15 C14 H14 119.9 . . ? 
C14 C15 C10 120.6(3) . . ? 
C14 C15 H15 119.7 . . ? 
C10 C15 H15 119.7 . . ? 
C21 C16 C17 118.4(3) . . ? 
C21 C16 P2 124.3(2) . . ? 
C17 C16 P2 117.32(19) . . ? 
C16 C17 C18 120.6(3) . . ? 
C16 C17 H17 119.7 . . ? 
C18 C17 H17 119.7 . . ? 
C19 C18 C17 120.7(3) . . ? 
C19 C18 H18 119.7 . . ? 
C17 C18 H18 119.7 . . ? 
C18 C19 C20 119.1(3) . . ? 
C18 C19 H19 120.4 . . ? 
C20 C19 H19 120.4 . . ? 
C19 C20 C21 120.4(3) . . ? 
C19 C20 H20 119.8 . . ? 
C21 C20 H20 119.8 . . ? 
C16 C21 C20 120.8(3) . . ? 
C16 C21 H21 119.6 . . ? 
C20 C21 H21 119.6 . . ? 
C23 C22 C27 118.5(2) . . ? 
C23 C22 P2 120.20(19) . . ? 
C27 C22 P2 121.0(2) . . ? 
C24 C23 C22 120.5(3) . . ? 
C24 C23 H23 119.8 . . ? 
C22 C23 H23 119.8 . . ? 
C25 C24 C23 120.1(3) . . ? 
C25 C24 H24 119.9 . . ? 
C23 C24 H24 119.9 . . ? 
C24 C25 C26 120.3(3) . . ? 
C24 C25 H25 119.8 . . ? 
C26 C25 H25 119.8 . . ? 
C25 C26 C27 120.0(3) . . ? 
C25 C26 H26 120.0 . . ? 
C27 C26 H26 120.0 . . ? 
C26 C27 C22 120.6(3) . . ? 
C26 C27 H27 119.7 . . ? 
C22 C27 H27 119.7 . . ? 
C33 C28 C29 114.6(3) . . ? 
C33 C28 Si1 120.8(2) . . ? 
C29 C28 Si1 124.6(2) . . ? 
C30 C29 C28 122.4(3) . . ? 
C30 C29 H29 118.8 . . ? 
C28 C29 H29 118.8 . . ? 
C31 C30 C29 120.5(3) . . ? 
C31 C30 H30 119.8 . . ? 
C29 C30 H30 119.8 . . ? 
C32 C31 C30 119.5(3) . . ? 
C32 C31 O2 124.7(3) . . ? 
C30 C31 O2 115.8(3) . . ? 
C31 C32 C33 119.1(3) . . ? 
C31 C32 H32 120.5 . . ? 
C33 C32 H32 120.5 . . ? 
C32 C33 C28 124.0(3) . . ? 
C32 C33 H33 118.0 . . ? 
C28 C33 H33 118.0 . . ? 
O2 C34 H34A 109.5 . . ? 
O2 C34 H34B 109.5 . . ? 
H34A C34 H34B 109.5 . . ? 
O2 C34 H34C 109.5 . . ? 
H34A C34 H34C 109.5 . . ? 
H34B C34 H34C 109.5 . . ? 
Si1 C35 H35A 109.5 . . ? 
Si1 C35 H35B 109.5 . . ? 
H35A C35 H35B 109.5 . . ? 
Si1 C35 H35C 109.5 . . ? 
H35A C35 H35C 109.5 . . ? 
H35B C35 H35C 109.5 . . ? 
Si1 C36 H36A 109.5 . . ? 
Si1 C36 H36B 109.5 . . ? 
H36A C36 H36B 109.5 . . ? 
Si1 C36 H36C 109.5 . . ? 
H36A C36 H36C 109.5 . . ? 
H36B C36 H36C 109.5 . . ? 
C42 C37 C38 119.1(2) . . ? 
C42 C37 Pd1 118.50(18) . . ? 
C38 C37 Pd1 122.27(19) . . ? 
C39 C38 C37 120.7(3) . . ? 
C39 C38 H38 119.7 . . ? 
C37 C38 H38 119.7 . . ? 
C40 C39 C38 119.7(3) . . ? 
C40 C39 H39 120.1 . . ? 
C38 C39 H39 120.1 . . ? 
C41 C40 C39 120.5(3) . . ? 
C41 C40 H40 119.7 . . ? 
C39 C40 H40 119.7 . . ? 
C40 C41 C42 120.8(3) . . ? 
C40 C41 H41 119.6 . . ? 
C42 C41 H41 119.6 . . ? 
C37 C42 C41 119.1(3) . . ? 
C37 C42 C43 121.0(2) . . ? 
C41 C42 C43 119.9(3) . . ? 
C42 C43 H43A 109.5 . . ? 
C42 C43 H43B 109.5 . . ? 
H43A C43 H43B 109.5 . . ? 
C42 C43 H43C 109.5 . . ? 
H43A C43 H43C 109.5 . . ? 
H43B C43 H43C 109.5 . . ? 
Si1 O1 Pd1 146.22(10) . . ? 
C31 O2 C34 117.3(2) . . ? 
C4 P1 C10 106.28(11) . . ? 
C4 P1 C1 100.26(12) . . ? 
C10 P1 C1 102.14(12) . . ? 
C4 P1 Pd1 112.11(9) . . ? 
C10 P1 Pd1 116.73(8) . . ? 
C1 P1 Pd1 117.43(8) . . ? 
C22 P2 C3 100.59(12) . . ? 
C22 P2 C16 104.25(11) . . ? 
C3 P2 C16 105.40(12) . . ? 
C22 P2 Pd1 116.55(9) . . ? 
C3 P2 Pd1 116.73(8) . . ? 
C16 P2 Pd1 111.81(8) . . ? 
O1 Pd1 C37 91.17(8) . . ? 
O1 Pd1 P1 175.99(5) . . ? 
C37 Pd1 P1 84.82(7) . . ? 
O1 Pd1 P2 87.85(5) . . ? 
C37 Pd1 P2 178.39(7) . . ? 
P1 Pd1 P2 96.15(2) . . ? 
O1 Si1 C35 115.02(11) . . ? 
O1 Si1 C36 109.59(12) . . ? 
C35 Si1 C36 106.00(13) . . ? 
O1 Si1 C28 111.12(10) . . ? 
C35 Si1 C28 106.91(12) . . ? 
C36 Si1 C28 107.86(13) . . ? 
C45 C44 C49 120.0 . . ? 
C45 C44 H44 120.0 . . ? 
C49 C44 H44 120.0 . . ? 
C46 C45 C44 120.0 . . ? 
C46 C45 H45 120.0 . . ? 
C44 C45 H45 120.0 . . ? 
C45 C46 C47 120.0 . . ? 
C45 C46 H46 120.0 . . ? 
C47 C46 H46 120.0 . . ? 
C48 C47 C46 120.0 . . ? 
C48 C47 H47 120.0 . . ? 
C46 C47 H47 120.0 . . ? 
C47 C48 C49 120.0 . . ? 
C47 C48 H48 120.0 . . ? 
C49 C48 H48 120.0 . . ? 
C48 C49 C44 120.0 . . ? 
C48 C49 H49 120.0 . . ? 
C44 C49 H49 120.0 . . ? 
C51 C50 C55 120.0 . . ? 
C51 C50 H50 120.0 . . ? 
C55 C50 H50 120.0 . . ? 
C52 C51 C50 120.0 . . ? 
C52 C51 H51 120.0 . . ? 
C50 C51 H51 120.0 . . ? 
C53 C52 C51 120.0 . . ? 
C53 C52 H52 120.0 . . ? 
C51 C52 H52 120.0 . . ? 
C52 C53 C54 120.0 . . ? 
C52 C53 H53 120.0 . . ? 
C54 C53 H53 120.0 . . ? 
C53 C54 C55 120.0 . . ? 
C53 C54 H54 120.0 . . ? 
C55 C54 H54 120.0 . . ? 
C54 C55 C50 120.0 . . ? 
C54 C55 H55 120.0 . . ? 
C50 C55 H55 120.0 . . ? 
C57 C56 C61 120.0 . . ? 
C57 C56 H56 120.0 . . ? 
C61 C56 H56 120.0 . . ? 
C56 C57 C58 120.0 . . ? 
C56 C57 H57 120.0 . . ? 
C58 C57 H57 120.0 . . ? 
C59 C58 C57 120.0 . . ? 
C59 C58 H58 120.0 . . ? 
C57 C58 H58 120.0 . . ? 
C60 C59 C58 120.0 . . ? 
C60 C59 H59 120.0 . . ? 
C58 C59 H59 120.0 . . ? 
C61 C60 C59 120.0 . . ? 
C61 C60 H60 120.0 . . ? 
C59 C60 H60 120.0 . . ? 
C60 C61 C56 120.0 . . ? 
C60 C61 H61 120.0 . . ? 
C56 C61 H61 120.0 . . ? 
 
_diffrn_measured_fraction_theta_max    0.997 
_diffrn_reflns_theta_full              25.39 
_diffrn_measured_fraction_theta_full   0.997 
_refine_diff_density_max    0.402 
_refine_diff_density_min   -0.275 
_refine_diff_density_rms    0.057 
_publ_requested_category         FM 
 
_publ_section_references 
; 
Bruker (2001). SAINT, SHELXTL, SMART, XCIF.  Bruker AXS, Inc., 
Madison, Wisconsin, USA. 
 
; 
 
_publ_section_figure_captions 
; 
Figure 1.  SHELXTL (Bruker, 2001) plot showing 35% probability ellipsoids 
for non-H atoms and circles of arbitrary size for H atoms.  The solvate 
molecule was omitted for clarity. 
; 
 
_publ_section_exptl_prep 
; 
Crystals were grown by evaporation from benzene solution. 
; 
 
_publ_section_exptl_refinement 
; 
The proposed model includes two disordered benzene solvates.  One of these 
solvates is disordered about the inversion center.  Rigid-bond restraints 
with similar amplitudes were imposed on solvate displacements parameters. 
Methyl H atom positions, R-CH~3~, were optimized by rotation about R-C 
bonds with idealized C-H, R--H and H--H distances.  Remaining H atoms were 
included as riding idealized contributors.  Methyl H atom U's were assigned 
as 1.5 times U~eq~ of the carrier atom; remaining H atom U's were assigned 
as 1.2 times carrier U~eq~. 
; 
 
_publ_contact_author 
; 
Scott R. Wilson 
University of Illinois 
School of Chemical Sciences, Box 59-1 
505 South Mathews Avenue 
Urbana, Illinois  61801 
USA 
; 
_publ_contact_author_phone        '1  217 244 1708' 
_publ_contact_author_fax          '1  217 244 8068' 
_publ_contact_author_email        srwilson@uiuc.edu 
_publ_contact_letter 
; 
Please consider this CIF submission for publication as a structural paper 
in Acta Crystallographica E. 
; 
_publ_requested_journal           J. Am. Chem. Soc.
_publ_requested_coeditor_name     ? 
 
_publ_section_title 
; 
 ? 
; 
 
_publ_section_abstract 
; 
 ? 
; 
 
_publ_section_comment 
; 
 ? 
; 
 
_publ_section_acknowledgements 
; 
The Materials Chemistry Laboratory at the University of Illinois was 
supported in part by grants NSF CHE 95-03145 and NSF CHE 03-43032 
from the National Science Foundation. 
; 
 
loop_ 
 _publ_author_name 
 _publ_author_address 
'Denmark, Scott E.' 
; 
Department of Chemistry 
University of Illinois 
600 South Mathews Avenue 
Urbana, Illinois  61801 
USA
; 
'Tymonko, Steven A.' 
; 
Department of Chemistry 
University of Illinois 
600 South Mathews Avenue 
Urbana, Illinois  61801 
USA 
;  

'Wilson, Scott R.' 
; 
University of Illinois 
School of Chemical Sciences, Box 59-1 
505 South Mathews Avenue 
Urbana, Illinois  61801 
USA 
; 
'Prussak-Wieckowska, Teresa' 
; 
University of Illinois 
School of Chemical Sciences, Box 59-1 
505 South Mathews Avenue 
Urbana, Illinois  61801 
USA 
; 
 
loop_ 
 _exptl_crystal_face_index_h 
 _exptl_crystal_face_index_k 
 _exptl_crystal_face_index_l 
 _exptl_crystal_face_perp_dist 
    0.00    0.00    1.00    0.0400 
    0.00    0.00   -1.00    0.0400 
    0.00    1.00    0.00    0.1300 
    0.00   -1.00    0.00    0.1300 
    1.00    0.00    0.00    0.1800 
   -1.00    0.00    0.00    0.1800 
